## 28 **Abstract**

29

30 *Wolbachia*-mediated protection against viral infection has been extensively  
31 demonstrated in *Drosophila* and in mosquitoes that are artificially inoculated with *D.*  
32 *melanogaster* *Wolbachia* (wMel), but to date no evidence for *Wolbachia*-mediated  
33 antibacterial protection has been demonstrated in *Drosophila*. Here we show that *D.*  
34 *melanogaster* carrying wMel shows reduced mortality during enteric – but not systemic  
35 - infection with the opportunist pathogen *Pseudomonas aeruginosa*, and that protection  
36 is more pronounced in male flies. *Wolbachia*-mediated protection is associated with  
37 increased early expression of the antimicrobial peptide *attacinA*, followed by increased  
38 expression of a ROS detoxification gene (*gstD8*), and other tissue damage repair genes  
39 which together contribute to greater host resistance and disease tolerance. These  
40 results highlight that the route of infection is important for symbiont-mediated  
41 protection from infection, that *Wolbachia* can protect hosts by eliciting a combination of  
42 resistance and disease tolerance mechanisms, and that these effects are sexually  
43 dimorphic.

44

## 45 **Introduction**

46 All organisms experience a combination of beneficial and detrimental  
47 colonisations by pathogens, commensals and symbionts, with profound effects on host  
48 physiology, behaviour, ecology and evolution (Bennett and Moran, 2015; Douglas, 2015;  
49 Gandon and Vale, 2014; Lewis and Lizé, 2015; Werren et al., 2008). Bacterial  
50 endosymbionts of insects, for example, are known to manipulate host reproduction  
51 (Engelstädter and Hurst, 2009; Werren et al., 2008), to alter the host's acquisition of  
52 essential nutrients (Douglas, 2015, 1998), and to provide protection from the deleterious  
53 effects of parasites and pathogens (Brownlie and Johnson, 2009; Hamilton and Perlman,  
54 2013).

55 *Wolbachia* is a maternally-inherited, intracellular bacterium of arthropods and  
56 nematodes, and is one of the best studied microbial symbionts (Brownlie and Johnson,  
57 2009; Hamilton and Perlman, 2013). Its host range is vast, with recent estimates that  
58 48-57% of all terrestrial arthropods (Weinert et al., 2015), and at least 10% of all  
59 *Drosophila* species carry *Wolbachia* (Mateos et al., 2006). The ability of some *Wolbachia*  
60 strains to protect insect hosts from pathogenic infections make it particularly relevant  
61 for potential bio-control of insect vectored zoonotic infections, and more broadly,  
62 relevant as mediators of pathogen-mediated selection in insects (Brownlie and Johnson,  
63 2009; Hamilton and Perlman, 2013; Karyn N. Johnson, 2015). *Aedes aegypti* and *Ae.*  
64 *albopictus* mosquitoes, for example, have been shown to become more resistant to  
65 Dengue and Chikungunya viruses, as well as malaria-causing *Plasmodium* when they are  
66 experimentally inoculated with *Wolbachia* (Bian et al., 2010; Kambris et al., 2010;  
67 Moreira et al., 2009). In *Drosophila*, there is also ample evidence that flies carrying  
68 *Wolbachia* are better able to survive infection by a number of naturally occurring RNA  
69 viruses (Hedges et al., 2008; Hedges and Johnson, 2008; Karyn N Johnson, 2015;  
70 Teixeira et al., 2008). This anti-viral protection is variable among strains of *Wolbachia*  
71 and correlates strongly with the reduction in viral titres within hosts (Martinez et al.,

72 2014), suggesting that *Wolbachia* generally enhances the ability to clear pathogens  
73 (increasing host resistance) rather than the ability to repair damage independently of  
74 pathogen clearance (disease tolerance) (Ayres and Schneider, 2012; Råberg et al., 2009).

75 In contrast to the strong evidence for *Wolbachia*-mediated antiviral protection,  
76 its ability to protect its native fruit fly hosts from bacterial infections has not been  
77 clearly demonstrated to date. In one study, carrying *Wolbachia* did not affect the  
78 survival or immune activity of *D. simulans* or *D. melanogaster* during systemic infection  
79 with *Pseudomonas aeruginosa*, *Serratia marcescens* or *Erwinia carotovora* (Wong et al.,  
80 2011), while another study found that the presence of *Wolbachia* had no effect on the  
81 ability to suppress pathogen growth during systemic infections by intracellular (*Listeria*  
82 *monocytogenes*, *Salmonella typhimurium*) or extracellular bacterial pathogens  
83 (*Providencia rettgeri*) (Rottschaefer and Lazzaro, 2012). Given that *Wolbachia* can  
84 provide broad-spectrum protection against a range of pathogens, including bacteria, in  
85 mosquitoes (Ye et al., 2013), the lack of evidence for antibacterial protection in flies is  
86 puzzling. Some authors have proposed that antibacterial protection may only occur in  
87 novel host-*Wolbachia* associations (like those of mosquitoes), although the exact  
88 mechanism for such protection remains unclear (Wong et al., 2011; Zug and  
89 Hammerstein, 2015).

90 One possibility is that the experimental conditions under which *Drosophila* are  
91 commonly challenged with pathogens in the lab do not reflect the infections they are  
92 likely to encounter in the wild. For example, experimental infections often focus on  
93 systemic infection, introducing large quantities of bacterial pathogens via intra-thoracic  
94 or abdominal injection (Neyen et al., 2014; Rottschaefer and Lazzaro, 2012; Wong et al.,  
95 2011). The ecological context of fruit flies however, which consists mainly of foraging on  
96 rotting organic matter, means that most pathogens in the wild are more likely to be  
97 acquired orally, resulting in enteric, rather than systemic infections (Ferreira et al.,  
98 2014; Stevanovic and Johnson, 2015). It is therefore conceivable that any form of

99 *Wolbachia*-mediated protection that could have evolved in the context of enteric  
100 infection may not be detected during systemic infection.

101 Here we show that the route of infection is indeed important for *Wolbachia*-  
102 mediated protection in *Drosophila*, which we find to occur during enteric - but not  
103 systemic - infection by the opportunist pathogen *Pseudomonas aeruginosa*. *P. aeruginosa*  
104 has an incredibly broad host range, infecting insects, nematodes, plants, and vertebrates,  
105 and is found in most environments (Apidianakis and Rahme, 2009; Neyen et al., 2014).  
106 Enteric infection of *Drosophila* by *P. aeruginosa* results in pathology to intestinal  
107 epithelia due the formation of a bacterial biofilm in the crop, a food storage organ in the  
108 foregut (Mulcahy et al., 2011; Sibley et al., 2008). In the majority of enteric infections *P.*  
109 *aeruginosa* growth is restricted to the crop, and is sufficient to cause death (Chugani et  
110 al., 2001; Sibley et al., 2008). We exposed flies that were naturally infected with  
111 *Wolbachia*, and identical derived flies that were cured of *Wolbachia* infection, to *P.*  
112 *aeruginosa* either through intra-thoracic pricking (causing a systemic infection) or  
113 through the oral route of infection by feeding (causing an enteric infection). We then  
114 monitored how within-host microbe loads and survival varied throughout the course of  
115 an infection to assess if (1) *Wolbachia*-mediated protection occurred during systemic  
116 and enteric bacterial infection; (2) when protection was detected, if this was due to  
117 differences in the bacterial clearance rate (resistance) or if it aided host survival despite  
118 high microbe loads (tolerance); and (3) how these protective effects differed between  
119 male and female flies. We further characterized the expression of immune and damage  
120 repair genes previously shown to be involved in enteric bacterial infection in *Drosophila*.

121

## 122 **Results**

### 123 ***Wolbachia* reduces mortality during enteric but not systemic bacterial** 124 **infection**

125

126 All flies infected systemically with PA14 via intra-thoracic pricking died within  
127 24 hours (Fig 1a), and in line with previous work (Wong et al., 2011), we did not detect  
128 any significant effect of *Wolbachia* status on the rate at which they died (Cox  
129 Proportional Hazard Model, Likelihood Ratio  $X^2 = 0.003$ ,  $DF=1$ ,  $p=0.959$ ), regardless of  
130 sex (‘Sex’ effect,  $X^2= 0.860$ ,  $DF=1$ ,  $p=0.354$ ). Flies that ingested and acquired an enteric  
131 infection of PA14 died at a faster rate than control flies exposed only to a sucrose  
132 solution (**Fig. 1b**; ‘Infection status’ effect, Likelihood Ratio  $X^2 = 64.27$ ,  $DF=1$ ,  $p<0.0001$ ).  
133 Fly mortality during enteric infection was significantly affected by their *Wolbachia*  
134 status ( $X^2 = 6.32$ ,  $DF=1$ ,  $p=0.013$ ). This protective effect was not substantial in female  
135 flies: female flies without *Wolbachia* were 1.58 more likely to die than infected females  
136 carrying *Wolbachia* (Cox risk ratio,  $X^2=1.27$ ,  $p=0.2644$ ). The protection in male flies was  
137 more pronounced, where not carrying *Wolbachia* made PA14-infected males 2.26 times  
138 more likely to die than their infected *Wolbachia*-positive counterparts (Cox risk ratio,  
139  $X^2= 4.22$ ,  $p=0.0172$ )(Figure 1b). In order to understand the cause of the observed  
140 protection during enteric but not systemic infection protection, the results below focus  
141 only on flies that acquired infection orally.

142

### 143 ***Wolbachia* does not affect the rate of bacterial clearance during enteric** 144 **infection**

145

146 Following 12 hours of exposure to *P. aeruginosa*, bacterial loads decreased over  
147 the course of the experiment in both male and female flies (**Fig. 2**) time effect  
148  $F_{7,186}=48.81$ ,  $p<0.0001$ ). However, the rate at which infection was cleared was not  
149 affected by *Wolbachia* status (‘Time × *Wolbachia*’ interaction  $F_{7,186}=5.71$ ,  $p=0.30$ ), which  
150 suggests that the presence of *Wolbachia* does not contribute to the clearance of this  
151 bacterial gut infection. Regardless of *Wolbachia* status, we observed that males and  
152 females showed different patterns of bacterial clearance over time (**Fig. 2**; ‘Time × Sex’  
153 interaction  $F_{7,186}=4.21$ ,  $p=0.002$ ). While males appeared to be able to clear the infection

154 almost entirely within a week (mean  $\pm$  SEM  $0.85 \pm 0.29$  Log<sub>10</sub> CFU per fly at 168 hours  
155 post exposure) females appeared to stop clearing infection after 96h, maintaining a  
156 relatively stable bacterial load of about 100 CFUs per fly until the end of the experiment  
157 (**Fig. 2**). These sex differences in bacterial clearance were present regardless of the  
158 *Wolbachia* status of the flies, suggesting they reflect sexual dimorphism in antibacterial  
159 defence and not to sex-specific effects of *Wolbachia* (Sex  $\times$  *Wolbachia* interaction  
160  $F_{1,186}=0.10$ ,  $p=0.758$ ).

161

### 162 **Male flies with *Wolbachia* have lower bacterial loads in the early stages of** 163 **enteric infection**

164

165 The initial stages of exposure to pathogens can be crucial in determining  
166 whether the host controls infection or if a pathogen grows to a point where hosts are  
167 killed. Even though we detected no difference in the rate of clearance according to  
168 *Wolbachia* status throughout the infection, at 12 and 24-hours post-infection male flies  
169 harbouring *Wolbachia* showed significantly lower bacterial CFUs compared to those  
170 without *Wolbachia* (Fig 2; Wol+:  $3.86 \pm 0.22$  Log<sub>10</sub> CFU; Wol-:  $4.56 \pm 0.22$  Log<sub>10</sub> CFU;  $F_{1,20} =$   
171  $5.27$ ,  $p= 0.033$ ). One explanation for the difference in initial microbe loads in males is  
172 that *Wolbachia* could cause behavioural changes, such as reduced feeding rate, that  
173 result in reduced infection. However, we did not find evidence that the lower CFU  
174 numbers seen in *Wolbachia*-positive male flies resulted from lower feeding rates (Fig.  
175 S1). Another potential explanation for the difference in initial microbe loads in males is a  
176 *Wolbachia*-mediated antimicrobial response. Whole fly homogenate added to growing  
177 cultures of PA14 (in both liquid and solid growth medium) showed greater  
178 antimicrobial activity in homogenates of *Wolbachia* positive flies (Figure S2 and S3).

179

### 180 ***Wolbachia*-positive flies show increased expression of IMD pathway genes** 181 **during the early stages of enteric infection**

182 Given the preliminary evidence of increased antimicrobial activity in *Wolbachia* –  
183 positive males (Figure S2 and S3), we decided to test for differences in the expression of  
184 antimicrobial immune pathways. While previous work has found no effect of *Wolbachia*  
185 on the expression of immune genes (Wong et al., 2011), or on bacterial  
186 clearance (Rottschaefer and Lazzaro, 2012), this has not been tested in the context of  
187 enteric bacterial infection. Other studies in *Wolbachia*-free flies have demonstrated that  
188 the IMD pathway plays an active role in the response to enteric bacterial infection  
189 (Buchon et al., 2014, 2009; Kuraishi et al., 2011). We therefore tested whether flies  
190 carrying *Wolbachia* showed increased expression of genes involved in IMD-mediated  
191 antimicrobial immunity.

192 In *Wolbachia*-positive females, we observed a significant increase in expression  
193 (relative to uninfected females) of two IMD pathway receptor genes– *pgrp-lc* ( $p =$   
194  $0.0002$ ) and *pgrp-le* ( $p = 0.004$ ) at 96-hours post-infection (Fig. 3). In PA14-infected  
195 males, however, carrying *Wolbachia* resulted in a slight decrease in *pgrp-lc* expression  
196 relative to uninfected males ( $p = 0.03$ ), although this difference was transient and only  
197 observed at 24-hours post-infection (Fig. 3). Overall there appears to be little effect of  
198 *Wolbachia* on the expression of either receptor gene in male flies (Fig 3). We observed a  
199 significant 3 to 4-fold increase in the expression of the antimicrobial peptide (AMP) gene  
200 *attacinA* (*attA*) in *Wolbachia*-positive males at both 24 hours ( $p = 0.002$ ) and 96 hours  
201 ( $p < 0.001$ ) post-infection. We did not detect any difference in the expression of this  
202 AMP gene in male flies that were free of *Wolbachia*, or in female flies, regardless of their  
203 *Wolbachia* status (Fig. 3). These results suggest that the initial difference in clearance  
204 between Wol+ and Wol- male flies could at least in part be due to *Wolbachia*-mediated  
205 up-regulation of the AMP *attacinA*.

206

207 ***Wolbachia* contributes to increased disease tolerance in male flies**



208           The data we describe above reveals interesting differences in the way male and  
209 female flies fight enteric bacterial infection. Male flies are able to clear infection almost  
210 completely, while female flies stop clearing infection after 96 hours and maintain a  
211 stable bacterial load following that same time period, which suggests that male flies are  
212 better than females at clearing enteric PA14 infection (**Fig. 2**). We could therefore  
213 expect females to pay a survival cost due to higher bacterial loads but instead we find  
214 that female flies have a similar survival probability to males, especially for flies that are  
215 *Wolbachia* negative (**Fig. 1**). This suggests that females are better able than males to  
216 tolerate *P. aeruginosa* enteric infection because they are able to maintain a similar level  
217 of health to females, while tolerating higher bacterial loads (Ayres and Schneider, 2012;  
218 Medzhitov et al., 2012; Råberg et al., 2009). Male flies, however, showed a marked  
219 increase in survival when they were *Wolbachia* positive compared to *Wolbachia*  
220 negative males (**Fig. 1**), even though the rate at which both groups clear infection  
221 appear identical (**Fig. 2**). This suggests increased tolerance in males mediated by the  
222 presence of *Wolbachia*. In females, the survival benefit of *Wolbachia* appeared to be  
223 minimal, suggesting that *Wolbachia*-mediated tolerance could be sex-specific.

224           To better assess these differences in disease tolerance mediated by sex and  
225 *Wolbachia* status, we plotted the relationship between host health and microbe load for  
226 matching time-points (Fig. 4). In all cases, these data were better described by a non-  
227 linear 4-parameter logistic model than a linear model (Table S1). The 4-parameter  
228 logistic model is useful to compare how its maximum (reflecting health in the initial  
229 stages of infection), baseline (reflecting the lowest survival reached during the  
230 experiment), inflection point (the point at which fly survival reached halfway between  
231 the baseline and maximum), and the growth rate (reflecting the rate at which fly  
232 survival plummets) vary according to host sex and *Wolbachia* status. Each of these  
233 parameters may reflect distinct mechanisms of damage repair involved in host infection  
234 tolerance, so they are useful for further exploration of tolerance mechanisms (Ayres and

235 Schneider, 2012; Vale et al., 2016). In female flies, the logistic model explained about a  
236 quarter of the variance ( $R^2=0.24$ ), and a formal parallelism test found that the curves did  
237 not show significantly different shapes ( $F_{3,72}=0.886$ ,  $p=0.452$ ). In male flies, the 4-  
238 parameter logistic model explained over half the variance ( $R^2=0.57$ ), and a formal  
239 parallelism test revealed significant differences in the shapes of these two tolerance  
240 curves between *Wolbachia*-positive and *Wolbachia*-negative males ( $F_{3,72} = 2.98$ ,  
241  $p=0.037$ ). These differences arise not only to the consistently lower maximum and  
242 baseline survival in *Wolbachia*-negative males regardless of microbe load (Figure 4), but  
243 also due to differences in the inflection point of each curve which occurs later in the  
244 infectious period in *Wolbachia*-positive male flies (Figure 4).

245

246

247 ***Wolbachia* is associated with higher expression of a ROS detoxification**  
248 **gene in males and epithelial repair genes in females during enteric**  
249 **infection**

250 Damage limitation mechanisms such as those involved in the response to  
251 oxidative stress, epithelial renewal and damage repair improve host health during  
252 infection while not acting directly to eliminate pathogens. They are therefore putative  
253 mechanisms of disease tolerance (Ayres and Schneider, 2012; Vale et al., 2014) and have  
254 previously been shown to be up-regulated during enteric bacterial infection (Buchon et  
255 al., 2009). Given the differences we observed in the ability to tolerate enteric bacterial  
256 infection (Fig. 4) we hypothesized that male and female flies may differ in the expression  
257 of such genes according to their *Wolbachia* status.

258 In male flies, enteric infection with PA14, led to increased expression of *gstD8* -  
259 involved in ROS detoxification (Buchon et al., 2009; Ha et al., 2005) - which was  
260 significantly higher at 96-hours post-infection in those harbouring *Wolbachia*, while no  
261 difference was observed in female *gstD8* expression according to *Wolbachia* status.

262 Since oral infection results in damage to insect guts (Buchon et al., 2014), we also  
263 measured the expression of two genes involved in epithelial renewal and damage repair  
264 (*gadd45* and CG32302) (Buchon et al., 2009). Both genes showed a significant increase  
265 in expression in *Wolbachia*-positive females. *Gadd45* expression was marginally higher  
266 in *Wolbachia*-positive females compared to those with out *Wolbachia* at 24-hours post-  
267 infection ( $p = 0.045$ ), but this difference increased by 96-hours post-infection ( $p < 0.001$ ).  
268 CG32302 expression was only transiently differentially expressed in *Wolbachia*-positive  
269 females at 24-hours post-infection. *Wolbachia*-negative males showed a significantly  
270 higher expression relative to *Wolbachia*-positive males of both *gadd45* ( $p = 0.014$ ) and  
271 CG32302 ( $p = 0.004$ ) at 24 hours post-infection, although this difference was no longer  
272 observed by 96-hours post-infection.

273

## 274 **Discussion**

275 During the last decade, it has become well established that endosymbionts like  
276 *Wolbachia* play a key role in conferring protection from pathogens in their insect hosts  
277 (Brownlie and Johnson, 2009; Hamilton and Perlman, 2013; Karyn N. Johnson, 2015). In  
278 its natural host *Drosophila*, *Wolbachia*-mediated protection is especially evident during  
279 viral infections (Chrostek et al., 2013; Hedges et al., 2008; Martinez et al., 2014; Teixeira  
280 et al., 2008), but protection from bacterial pathogens in *Drosophila* had not been  
281 demonstrated to date (Rottschaefer and Lazzaro, 2012; Wong et al., 2011). Here we  
282 show that the route of infection is important for *Wolbachia*-mediated protection from  
283 bacterial infection. We find that *Wolbachia* can protect *Drosophila* from enteric bacterial  
284 infection by eliciting a combination of resistance and disease tolerance mechanisms, and  
285 that these protective effects are sexually dimorphic.

286

## 287 **The route of infection matters**

288           The role of *Wolbachia* in protecting hosts from infection, either by increasing  
289 resistance or tolerance, is known in *Drosophila*-virus interactions, but previous work  
290 testing for antibacterial protection in *Drosophila* did not find a significant effect of  
291 *Wolbachia* (Rottschaefter and Lazzaro, 2012; Wong et al., 2011). Typically flies in  
292 previous studies were inoculated by intra-thoracic pricking or injection, and therefore  
293 experienced a systemic infection. In the wild however, infections are more likely to be  
294 acquired through the fecal-oral route (during feeding on decomposing fruit), with most  
295 pathogens colonising the gut before being shed through the faeces. *Drosophila*-  
296 *Wolbachia* interactions would therefore have co-evolved mainly under selection by  
297 pathogen infection in the gut, and any antibacterial protection that may have evolved as  
298 a consequence would not be expected to manifest during a highly virulent systemic  
299 infection (Liehl et al., 2006; Martins et al., 2013). Further, if *Wolbachia*-mediated  
300 protection is especially efficient in the fly gut, the damage caused by a generalised  
301 systemic infection could overwhelm any localised protection by *Wolbachia*, which could  
302 explain the lack of observed protection in previous studies of systemic bacterial  
303 infection in *Drosophila*. Future studies of host resistance and tolerance should therefore  
304 favour natural routes of infection in order to gain a more realistic picture of the  
305 mechanisms that hosts have evolved to fight infection.

306

307 ***Wolbachia*-mediated protection is a combination of pathogen clearance**  
308 **and damage limitation**

309           The mechanisms underlying *Wolbachia*-mediated protection are presently  
310 unclear, especially given that the extent of the protection, and whether it acts to increase  
311 resistance or tolerance appear to be pathogen specific (Chrostek et al., 2013; Martinez et  
312 al., 2014; Teixeira et al., 2008). In mosquitoes *Wolbachia* protection appears to be  
313 involved in a combination of general immune priming (Rancès et al., 2012), resource  
314 competition between *Wolbachia* and infectious agents (Caragata et al., 2013), and the

315 regulation of host genes involved in blocking pathogen replication (Zhang et al., 2013).  
316 In the current experiment it is notable that bacterial numbers did not increase  
317 throughout the course of the infection, but were cleared at a near exponential rate (Fig.  
318 2). Despite this, flies still died from infection, although *Wolbachia* reduced the mortality  
319 rate. One possibility is that most of the damage experienced by the host happens at the  
320 early stages of infection, and the fact that *Wolbachia*-positive flies show lower bacterial  
321 titres immediately after the exposure period (Fig. 2) may be the reason they also show  
322 higher survival later during the infection. This may explain why the male *Wolbachia*  
323 positive flies showed a slower rate of mortality, because *attacinA*-mediated clearance of  
324 PA14 within the first 24 hours post infection (Fig. 3) would have minimized gut damage  
325 caused by pathogen growth.

326         An alternative, although not mutually exclusive, possibility is that most of the  
327 damage that causes fly death arises from immunopathology, as an indirect side effect of  
328 mechanisms that clear pathogens. For example, a common and broad response to  
329 infection in insects is the activation of pathways that result in the production of reactive  
330 oxygen species (ROS)(Buchon et al., 2014; Ha et al., 2005; Zug and Hammerstein, 2015).  
331 ROS production is tightly regulated (Buchon et al., 2013; Ha et al., 2005), and only  
332 activated in response to pathogenic and not commensal bacteria (Lee et al., 2013).  
333 Previous work has shown that both mosquitoes (Pan et al., 2012) and flies (Wong et al.,  
334 2015) harbouring *Wolbachia* show higher ROS levels, but also that in some cases ROS  
335 production can lead to oxidative stress, DNA damage (Brennan et al., 2012) and damage  
336 to the fly gut epithelium (Buchon et al., 2014, 2013). We therefore hypothesised that  
337 mechanisms involved in detoxifying ROS during enteric infection with PA14 may  
338 underlie the differences in survival between flies with and without *Wolbachia* (Figure  
339 1). We chose to measure the expression of *gstD8*, involved in ROS detoxification,  
340 because it was previously shown to be up-regulated during enteric infection in  
341 *Drosophila* with another bacterial pathogen, *Erwinia carotovora* (Buchon et al., 2009).

342 We found that the expression of *gstD8* was elevated in *Wolbachia*-positive males, but not  
343 female flies following 96-hours of oral exposure to *P. aeruginosa*. This pattern of  
344 expression is consistent with the increased survival observed in *Wolbachia*-positive  
345 males compared to males without the endosymbiont (Figure 1b).

346 In addition to this detoxification response, we also measured the expression of  
347 genes involved in tissue damage repair (*gadd45*) and a component of the peritrophic  
348 matrix (*CG32302*), a protective barrier in the fly gut (Lehane, 1997). In males, the  
349 presence of *Wolbachia* did not result in an increase in these genes within 96 hours of  
350 oral exposure to PA14, but females carrying the endosymbiont showed significantly  
351 higher expression than *Wolbachia*-negative flies of *gadd45*. This shows that *Wolbachia*  
352 induces different damage limitation mechanisms in males (ROS detoxification) and  
353 females (tissue damage repair). We also observed transient increases in the expression  
354 of *CG32302*, another component of gut renewal, in *Wolbachia*-positive females at 24-  
355 hours post-infection). There was also a transient increase in expression at 24-hours  
356 post-infection of *gadd45* and *CG32302* in *Wolbachia*-negative males (Figure 5). We  
357 interpret these increases as a response to increased damage to gut tissue cause by the  
358 10-fold higher bacterial loads in these flies after 24 hours (Fig. 2), which was avoided in  
359 *Wolbachia*-positive males by *attacinA*-mediated clearance.

360 While previous work found no difference in genome-wide expression levels in  
361 adult *Drosophila* with or without *Wolbachia* (Teixeira, 2012), and only mild up-  
362 regulation of immune genes has been reported in *Drosophila* cell lines that are  
363 transiently infected (Xi et al., 2008), our gene expression results indicate that reducing  
364 immunopathology underlies *Wolbachia*-mediated protection from enteric bacterial  
365 infection. We are only beginning to understand the complex sequence of events that  
366 occur during gut infection in *Drosophila* (Lemaitre and Miguel-Aliaga, 2013), which not  
367 only consist of antimicrobial defence, but a multifaceted response that includes stress  
368 response, DNA damage repair, the renewal of damaged epithelial cells and gut structure,

369 and the maintenance of efficient metabolism (Buchon et al., 2010, 2009; Kuraishi et al.,  
370 2011).

371

## 372 **Sexual dimorphism in resistance and tolerance**

373         The differences in gene expression we describe above reflect two major forms of  
374 defence against infection: mechanisms that eliminate pathogens to reduce infection  
375 loads, leading to resistance, and mechanisms that limit the damage caused by infection  
376 without directly targeting the number of pathogens, leading to disease tolerance (Ayres  
377 and Schneider, 2012; Medzhitov et al., 2012; Råberg et al., 2009; Vale et al., 2014). While  
378 the majority of work on bacterial and viral infections in *Drosophila* (and most other  
379 hosts) has historically focused on mechanisms that eliminate and clear pathogens  
380 (Buchon et al., 2014; Obbard et al., 2009; Zambon et al., 2006), the role of mechanisms  
381 that limit damage to increase host tolerance is increasingly recognised (Ayres and  
382 Schneider, 2012; Medzhitov et al., 2012; Råberg et al., 2009; Soares et al., 2014; Vale et  
383 al., 2014). For example recent work has highlighted how tissue damage repair  
384 (Jamieson et al., 2013; Soares et al., 2014), immune regulation (Merkling et al., 2015;  
385 Sears et al., 2011), and detoxification (Gozzelino et al., 2012; Pamplona et al., 2007) all  
386 play a role in enhancing disease tolerance. Variation in disease tolerance is common  
387 (Adelman et al., 2013; Howick and Lazzaro, 2014; Råberg et al., 2007; Vale and Little,  
388 2012), and may arise from genetic differences in the physiological mechanisms that  
389 promote greater tolerance (Råberg et al., 2007), variation in host nutritional states  
390 (Howick and Lazzaro, 2014; Sternberg et al., 2012; Vale et al., 2011), and host gut  
391 microbiota (Yilmaz et al., 2014). Here we also find evidence for variation in disease  
392 tolerance associated with the presence of *Wolbachia*, and we find that these effects vary  
393 according to host sex.

394

395 *Wolbachia*-mediated protection against viral infections, such as *Drosophila* C  
396 Virus (DCV) acts by reducing viral replication (or increasing the host's ability to clear  
397 infection), suggesting that *Wolbachia* increases resistance against DCV (Hedges et al.,  
398 2008; Martinez et al., 2014; Teixeira et al., 2008). In other viral infections, for example  
399 Flock House Virus (FHV), flies harbouring *Wolbachia* appear to become more tolerant to  
400 infection, showing increased survival without any change in viral titres (Chrostek et al.,  
401 2013; Teixeira et al., 2008). Our results show that *Wolbachia* affects both resistance and  
402 tolerance to *P. aeruginosa* enteric infection and we found interesting differences  
403 between sexes in these responses. Without *Wolbachia* females were more tolerant than  
404 males, while males flies became more tolerant when carrying *Wolbachia*. While males  
405 and females are generally susceptible to the same pathogens, sexual dimorphism in the  
406 immune response is apparent in a wide range of species (Duneau and Ebert, 2012;  
407 Marriott and Huet-Hudson, 2006; Zuk and McKean, 1996), and is documented for all  
408 classes of viral, bacterial, fungal and parasitic infections [see (Cousineau and Alizon,  
409 2014) for a review]. In invertebrate hosts, and especially in *Drosophila*, most studies  
410 investigating the ability to resist or tolerate bacterial and viral infections have focused  
411 primarily on the underlying immune mechanisms (Ayres and Schneider, 2012; Buchon  
412 et al., 2014; Kemp and Imler, 2009; Neyen et al., 2014; Schneider et al., 2007), and  
413 typically these studies have not focused on sexual differences in these mechanisms [but  
414 see (Vincent and Sharp, 2014)]. Our results, together with a large body of work on  
415 immune sexual dimorphism (Nunn et al., 2009), show that resistance and tolerance  
416 mechanisms are likely to vary between males and females.

417

#### 418 **Evolutionary and epidemiological implications of sex-specific resistance and** 419 **tolerance**

420 Variation in resistance and tolerance will directly impact the pathogen loads  
421 within hosts (Gopinath et al., 2014; Lass et al., 2013; Susi et al., 2015; Vale et al., 2013),



422 and as a result, sexual dimorphism in these responses could generate potentially  
423 important heterogeneity in pathogen spread and evolution (Cousineau and Alizon, 2014;  
424 Duneau and Ebert, 2012; Gopinath et al., 2014; Vale et al., 2014). Given that *Wolbachia*  
425 are estimated to be highly prevalent in insect populations (Weinert et al., 2015), it is  
426 intriguing to consider the potential effects of sexual dimorphism in resistance and  
427 tolerance in populations. Theoretical work shows that markedly different evolutionary  
428 outcomes for the pathogen are expected when sexual dimorphism in resistance and  
429 tolerance is present (Cousineau and Alizon, 2014). One reason is that the mortality rate  
430 of males and females will vary due to dimorphism in resistance and tolerance, which in  
431 itself will affect the evolutionary trajectories of pathogens (because it will bias infection  
432 towards the one sex more than another). Further experimental work is currently needed  
433 to test how pathogens are likely to evolve under different host sex ratios, especially  
434 when sexual dimorphism in resistance and tolerance is present. Our work suggests that  
435 bacterial oral infection in flies benefiting from sex-specific *Wolbachia*-mediated  
436 tolerance would offer a useful model system to address these questions.  
437

## 438 **Materials And Methods**

### 439 **Fly stocks**

440  
441 Experiments were carried out using long-term lab stocks of *Drosophila melanogaster*  
442 Oregon R (OreR). This line was originally infected with *Wolbachia* strain wMel,  
443 (OreR<sup>Wol+</sup>). To obtain a *Wolbachia*-free line of the same genetic background (OreR<sup>Wol-</sup>),  
444 OreR<sup>Wol+</sup> flies were cured of *Wolbachia* by rearing them on cornmeal Lewis medium  
445 supplemented with 0.05 mg/ml tetracycline. This treatment was carried out at least 3  
446 years before these experiments were conducted, and the *Wolbachia* status of both fly  
447 lines was verified using PCR with primers specific to *Wolbachia* surface protein (wsp):  
448 forward (5'-3'): GTCCAATAGCTGATGAAGAAAC; reverse (5'-3'):  
449 CTGCACCAATAGCGCTATAAAA. Both lines were kept as long-term lab stocks on a  
450 standard diet of cornmeal Lewis medium, at a constant temperature of 18±1°C with a  
451 12-hour light/dark cycle. Flies were acclimatised at 25°C for at least two generations  
452 prior to experimental infections.

453

### 454 **Bacterial cultures**

455  
456 Infections were carried out using the *P. aeruginosa* reference strain PA14, which has  
457 been shown to have a very broad host range (He et al., 2004; Mikkelsen et al., 2011). To  
458 obtain isogenic PA14 cultures, a frozen stock culture was streaked onto fresh LB agar  
459 plates and single colonies were inoculated into 50 mL LB broth and incubated overnight  
460 at 37 °C with shaking at 150 rpm. Overnight cultures were diluted 1:100 into 500 mL  
461 fresh LB broth and incubated again at 37 °C with shaking at 150 rpm. At the mid log  
462 phase (OD<sub>600</sub> = 1.0) we harvested the bacterial cells by centrifugation at 8000 rpm for 10  
463 min, washed the cells twice with 1xPBS and re-suspended the bacterial pellet in 5%  
464 sucrose. The final inoculum was adjusted to OD<sub>600</sub> = 25, and this was the bacterial  
465 inoculum used for all flies inoculated orally (enteric infection).

466

467 **Enteric and systemic *P. aeruginosa* infection**

468

469 For systemic infection, flies were pricked at the pleural suture with a needle dipped in a  
470 mid log phase ( $OD_{600} = 1.0$ ) PA14 culture, grown as described above. Control flies were  
471 pricked with a needle dipped in sterile LB broth. For the oral exposure (enteric  
472 infection), the concentrated PA14 inoculum ( $OD_{600} = 25$ ) was spotted onto a sterile filter  
473 paper (80  $\mu$ L/ filter paper), and placed onto a drop of solidified 5% sugar Agar inside  
474 the lid of a 7ml Bijou tube. For the uninfected control treatment, filters received the  
475 equivalent volume of 5% sucrose solution only. All filter papers were allowed to dry for  
476 20 to 30 minutes at room temperature. We prepared one of these “inoculation lids” for  
477 each individual fly. Two to four day-old flies were sex sorted and transferred  
478 individually to empty plastic vials: 180 (90 male and 90 female) OreR<sup>Wol+</sup>, and 180 (90  
479 male and 90 female) OreR<sup>Wol-</sup>. Following 2-4 hours of starvation, flies were transferred  
480 individually to 7 ml Bijou tubes, and covered with previously prepared “inoculation lids”  
481 containing a filter paper soaked in PA14 culture. Flies were left to feed on the bacterial  
482 culture for approximately 12 hours at 25 °C. Following this period, we sacrificed 6  
483 exposed and 2 control flies and counted CFUs by plating the fly homogenate in  
484 *Pseudomonas* isolating media (PAIM). The remaining flies were transferred to vials  
485 containing 5% sugar agar and incubated at 25 °C.

486

487 **Quantification of within-host bacterial loads**

488

489 Following the initial 12-hour exposure, every 24 hours we randomly sampled 5 to 7 live  
490 flies per sex and *Wolbachia* status and quantified the microbe loads present inside the  
491 flies. Briefly, a single fly was removed from the vial and transferred to 1.5 mL  
492 microcentrifuge tubes. To guarantee we were only quantifying CFUs present inside the  
493 fly, and not those possibly on its surface, each fly was surface sterilized by adding 75%

494 ethanol for 30-60 seconds (to kill the outer surface bacterial species). Ethanol was  
495 discarded and flies were washed twice with distilled water. Plating 100  $\mu$ L of the 2<sup>nd</sup>  
496 wash in LB agar confirmed this method was efficient in cleaning the surface of the fly  
497 (no viable CFUs were detected). Each washed whole fly was placed in 1 mL of 1X PBS in  
498 a 1.5-mL screw-top microcentrifuge tube, centrifuged at 5000 rpm for 1 min and the  
499 supernatant was discarded. 200  $\mu$ L of LB broth was then added to each tube and the flies  
500 were thoroughly homogenised using a motorised pestle for 1 min. A 100  $\mu$ L aliquot of  
501 homogenate was taken for serial dilution and different dilutions were plated on PAIM  
502 agar plates, incubated at 37 °C for 24 - 48 h and viable CFUs were counted.

503

#### 504 **Survival assays**

505

506 We carried out separate experiments to measure how the presence of *Wolbachia*  
507 affected fly mortality during either enteric or systemic infection, with identical fly  
508 rearing and bacterial cultural conditions as those described above. For each survival  
509 assay (enteric or systemic infection routes), two-to-four day-old flies were sexed and  
510 exposed in groups of 10 flies to PA14, as described above. For each combination of male  
511 or female Ore<sup>R<sup>Wol+</sup></sup> and Ore<sup>R<sup>Wol-</sup></sup> line, we set up fifty flies, with 10 flies per vial. The flies  
512 that died from infection was recorded every approximately every hour until all flies had  
513 died (systemic infection), or every 24 hours for up to 8 days (enteric infection).

514

#### 515 **Statistical analyses of host survival and microbe loads**

516

517 Fly survival was analysed using a Cox proportional hazards model to compare survival  
518 rates, with fly 'Sex', 'Infection status', and '*Wolbachia* status' and their interactions as  
519 fixed effects. The significance of the effects was assessed using likelihood ratio tests  
520 following a  $\chi^2$  distribution. For flies that were exposed orally to DCV, we compared

521 between pairs of treatments (control vs. infected or with and without *Wolbachia*) using  
522 Cox risk ratios.

523

524 In orally infected flies, changes in the bacterial load within-hosts were analysed with a  
525 linear model with Log CFU as the response variable, and fly 'Sex', '*Wolbachia* status', and  
526 'Time (DPI)' as fixed effects. Differences in the mean bacterial load of flies immediately  
527 following oral exposure (at 12 hours post-infection; Fig S1) were also analysed  
528 separately using a linear model with Log CFU as the response variable and 'Sex' and  
529 '*Wolbachia* status' as fixed effects. In all models all effects and their interactions were  
530 tested in a fully factorial model, and models were simplified by removing non-significant  
531 interaction terms. All analyses were conducted in JMP 12 (SAS).

532

### 533 **Analysis of disease tolerance**

534 Disease tolerance is defined as the ability to maintain health relative to changes in  
535 microbe loads during an infection (Ayres and Schneider, 2012; Medzhitov et al., 2012;  
536 Råberg et al., 2009). It is possible to analyse tolerance as the time-ordered health  
537 trajectory of a host as microbe loads change (Doeschl-Wilson et al., 2012; Lough et al.,  
538 2015; Schneider, 2011). To assess sex- and *Wolbachia*-mediated differences in how sick  
539 a fly gets for a given pathogen load (tolerance) during the course of the infection, for  
540 each time point we took the survival probability (as a measure host health) and PA14  
541 CFUs present within the flies (as a measure of microbe load) for 5 replicate flies in each  
542 sex/*Wolbachia* combination. While tolerance is commonly described as a linear reaction  
543 norm (Lefèvre et al., 2011; Råberg et al., 2007; Simms, 2000), many other functional  
544 forms are possible, including non-linear relationships (Vale et al., 2014). To assess the  
545 form of the health/microbe relationship, we fit linear and non-linear 4-parameter  
546 logistic model separately to the time-matched survival/microbe load plots. In all cases,  
547 the 4 parameter logistic model – which is commonly use to asses dose-response curves

548 (Gottschalk and Dunn, 2005) - outperformed the linear fit (Table S1), and we present  
549 only the logistic fit in the results section. To test if these tolerance curves differed with  
550 *Wolbachia* status, we tested the parallelism of the models by comparing the error-sums  
551 of square for a full model (where each group has different parameters in the logistic  
552 model) to a reduced model (where models share all parameters except the inflection  
553 point) (Gottschalk and Dunn, 2005).

554

### 555 **Gene expression**

556 We used qRT-PCR to test for differences in the expression of genes known to be involved  
557 in either bacterial clearance or in the response to stress and gut damage during enteric  
558 infection. Previous work has shown that the IMD pathway and some stress response and  
559 damage repair genes are especially important during the fly's response to enteric  
560 bacterial pathogens (Buchon et al., 2009). We therefore investigated the expression of  
561 IMD pathway receptor genes (*pgrp - lc* and *pgrp - le*) and the antimicrobial peptide  
562 effector gene *attacin A* (*attA*); *gstD8*, a gene that participates in the detoxification of  
563 reactive oxygen species (ROS) produced during microbial immunity in the gut (Ha et al.,  
564 2005); *gadd45*, a gene relevant for epithelial renewal, as it is involved in stress response  
565 and wound healing in *Drosophila* (Stramer et al., 2008; Takekawa and Saito, 1998); and  
566 CG32302, a gene identified as up-regulated during enteric bacterial infection (Buchon et  
567 al., 2009). CG32302 has been annotated as a putative component of the peritrophic  
568 matrix (Buchon et al., 2009), a protective barrier that separates the gut epithelium from  
569 the invading bacteria (Lehane, 1997).

570 Our aim was to test if the expression of these genes varied in a sex- or  
571 *Wolbachia*-specific manner in flies that were infected orally. Groups of 5 flies for each  
572 sex / *Wolbachia* combination were exposed orally to *P. aeruginosa* infection in triplicate,  
573 as described above, and then frozen in TRI reagent at 4, 24 and 96 hours post-infection.  
574 Total RNA was extracted from flies homogenised in Tri Reagent (Ambion), reverse-

575 transcribed with M-MLV reverse transcriptase (Promega) and random hexamer  
576 primers, and then diluted 1:10 with nuclease free water. The qRT-PCR was performed  
577 on an Applied Biosystems StepOnePlus system using Fast SYBR Green Master Mix  
578 (Applied Biosystems) with the following PCR cycle: 95°C for 2min followed by 40 cycles  
579 of 95°C for 10 sec followed by 60°C for 30 sec. Three biological replicates and two qRT-  
580 PCR reactions per replicate (technical replicates) were carried out per sample. Gene-  
581 specific primers are reported in Table S1. Changes in gene expression were analysed  
582 relative to the expression of *rp49*, an internal control gene. The relative fold-change  
583 difference in expression between infected and health control flies was calculated as  
584 described in (Livak and Schmittgen, 2001). Briefly:

$$585 \text{Fold change} = 2^{-\Delta\Delta\text{Ct}}$$

586 Where,  $\Delta\Delta\text{Ct} = [(\text{Ct of Gene A} - \text{Ct of Internal control}) \text{ of Infected sample}] -$   
587  $[(\text{Ct of Gene A} - \text{Ct of Internal control}) \text{ of Control sample}]$

588 The fold change difference obtained was analysed using 3-way ANOVA with sex (Male,  
589 Female), Time (2, 24 and 96 hours) and *Wolbachia* (Wol- and Wol+) as fixed factors.

## 590 **Acknowledgements**

591  
592 We thank R. Popat for technical assistance, D. Obbard, F. Waldron, T.Little and S. Lewis  
593 for helpful discussion and suggestions, and H. Cowan, H. Borthwick for media  
594 preparation.

595

## 596 **Funding information**

597  
598 This work was supported by a strategic award from the Wellcome Trust for the Centre  
599 for Immunity, Infection and Evolution (<http://ciie.bio.ed.ac.uk>; grant reference no.

600 095831), and by a Society in Science – Branco Weiss fellowship ([http://www.society-in-](http://www.society-in-science.org)  
601 science.org), both awarded to P. Vale. P. Vale is also supported by a Chancellor's  
602 fellowship from the School of Biological Sciences

603

#### 604 **Author contributions**

605 PFV and RBV conceived the study. RBV, GV, JSJ, KMM and PFV conducted experimental  
606 work. GV and PFV analysed the data. PFV wrote the manuscript. SPB and PFV  
607 contributed reagents and consumables. All authors commented on the manuscript.

608



## 609 **References**

610

- 611 Adelman, J.S., Kirkpatrick, L., Grodio, Hawley, D.M., 2013. House Finch  
612 Populations Differ in Early Inflammatory Signaling and Pathogen  
613 Tolerance at the Peak of *Mycoplasma gallisepticum* Infection. *Am. Nat.*  
614 181, 674–689. doi:10.1086/670024
- 615 Apidianakis, Y., Rahme, L.G., 2009. *Drosophila melanogaster* as a model host for  
616 studying *Pseudomonas aeruginosa* infection. *Nat Protoc.* 4, 1285–1294.  
617 doi:10.1038/nprot.2009.124
- 618 Ayres, J.S., Schneider, D.S., 2012. Tolerance of Infections. *Annu. Rev. Immunol.* 30,  
619 271–294. doi:10.1146/annurev-immunol-020711-075030
- 620 Bashir-Tanoli, S., Tinsley, M.C., 2014. Immune response costs are associated with  
621 changes in resource acquisition and not resource reallocation. *Funct. Ecol.*  
622 28, 1011–1019. doi:10.1111/1365-2435.12236
- 623 Bennett, G.M., Moran, N.A., 2015. Heritable symbiosis: The advantages and perils  
624 of an evolutionary rabbit hole. *Proc. Natl. Acad. Sci. U. S. A.* 112, 10169–  
625 10176. doi:10.1073/pnas.1421388112
- 626 Bian, G., Xu, Y., Lu, P., Xie, Y., Xi, Z., 2010. The Endosymbiotic Bacterium  
627 *Wolbachia* Induces Resistance to Dengue Virus in *Aedes aegypti*. *PLoS*  
628 *Pathog* 6, e1000833. doi:10.1371/journal.ppat.1000833
- 629 Brennan, L.J., Haukedal, J.A., Earle, J.C., Keddie, B., Harris, H.L., 2012. Disruption of  
630 redox homeostasis leads to oxidative DNA damage in spermatocytes of  
631 *Wolbachia*-infected *Drosophila simulans*. *Insect Mol. Biol.* 21, 510–520.  
632 doi:10.1111/j.1365-2583.2012.01155.x
- 633 Brownlie, J.C., Johnson, K.N., 2009. Symbiont-mediated protection in insect hosts.  
634 *Trends Microbiol.* 17, 348–354. doi:10.1016/j.tim.2009.05.005
- 635 Buchon, N., Broderick, N.A., Kuraishi, T., Lemaitre, B., 2010. *Drosophila* EGFR  
636 pathway coordinates stem cell proliferation and gut remodeling following  
637 infection. *BMC Biol.* 8, 152.
- 638 Buchon, N., Broderick, N.A., Lemaitre, B., 2013. Gut homeostasis in a microbial  
639 world: insights from *Drosophila melanogaster*. *Nat. Rev. Microbiol.* 11,  
640 615–626. doi:10.1038/nrmicro3074
- 641 Buchon, N., Broderick, N.A., Poidevin, M., Pradervand, S., Lemaitre, B., 2009.  
642 *Drosophila* Intestinal Response to Bacterial Infection: Activation of Host  
643 Defense and Stem Cell Proliferation. *Cell Host Microbe* 5, 200–211.  
644 doi:10.1016/j.chom.2009.01.003
- 645 Buchon, N., Silverman, N., Cherry, S., 2014. Immunity in *Drosophila melanogaster*  
646 — from microbial recognition to whole-organism physiology. *Nat. Rev.*  
647 *Immunol.* 14, 796–810. doi:10.1038/nri3763
- 648 Caragata, E.P., Rancès, E., Hedges, L.M., Gofton, A.W., Johnson, K.N., O'Neill, S.L.,  
649 McGraw, E.A., 2013. Dietary Cholesterol Modulates Pathogen Blocking by  
650 *Wolbachia*. *PLoS Pathog* 9, e1003459. doi:10.1371/journal.ppat.1003459
- 651 Chrostek, E., Marialva, M.S.P., Esteves, S.S., Weinert, L.A., Martinez, J., Jiggins, F.M.,  
652 Teixeira, L., 2013. *Wolbachia* Variants Induce Differential Protection to  
653 Viruses in *Drosophila melanogaster*: A Phenotypic and Phylogenomic  
654 Analysis. *PLoS Genet.* 9. doi:10.1371/journal.pgen.1003896
- 655 Chugani, S.A., Whiteley, M., Lee, K.M., D'Argenio, D., Manoil, C., Greenberg, E.P.,  
656 2001. QsCR, a modulator of quorum-sensing signal synthesis and

- 657 virulence in *Pseudomonas aeruginosa*. *Proc. Natl. Acad. Sci.* 98, 2752–  
658 2757. doi:10.1073/pnas.051624298
- 659 Cousineau, S.V., Alizon, S., 2014. Parasite evolution in response to sex-based host  
660 heterogeneity in resistance and tolerance. *J. Evol. Biol.* 27, 2753–2766.  
661 doi:10.1111/jeb.12541
- 662 Doeschl-Wilson, A.B., Bishop, S.C., Kyriazakis, I., Villanueva, B., 2012. Novel  
663 methods for quantifying individual host response to infectious pathogens  
664 for genetic analyses. *Front. Livest. Genomics* 3, 266.  
665 doi:10.3389/fgene.2012.00266
- 666 Douglas, A.E., 2015. Multiorganismal Insects: Diversity and Function of Resident  
667 Microorganisms. *Annu. Rev. Entomol.* 60, 17–34. doi:10.1146/annurev-  
668 ento-010814-020822
- 669 Douglas, A.E., 1998. Nutritional Interactions in Insect-Microbial Symbioses:  
670 Aphids and Their Symbiotic Bacteria *Buchnera*. *Annu. Rev. Entomol.* 43,  
671 17–37. doi:10.1146/annurev.ento.43.1.17
- 672 Duneau, D., Ebert, D., 2012. Host sexual dimorphism and parasite adaptation.  
673 *PLoS Biol.* 10, e1001271. doi:10.1371/journal.pbio.1001271
- 674 Engelstädter, J., Hurst, G.D.D., 2009. The Ecology and Evolution of Microbes that  
675 Manipulate Host Reproduction. *Annu. Rev. Ecol. Evol. Syst.* 40, 127–149.  
676 doi:10.1146/annurev.ecolsys.110308.120206
- 677 Ferreira, Á.G., Naylor, H., Esteves, S.S., Pais, I.S., Martins, N.E., Teixeira, L., 2014.  
678 The Toll-Dorsal Pathway Is Required for Resistance to Viral Oral Infection  
679 in *Drosophila*. *PLoS Pathog.* 10. doi:10.1371/journal.ppat.1004507
- 680 Gandon, S., Vale, P.F., 2014. The evolution of resistance against good and bad  
681 infections. *J. Evol. Biol.* 27, 303–312. doi:10.1111/jeb.12291
- 682 Gopinath, S., Lichtman, J.S., Bouley, D.M., Elias, J.E., Monack, D.M., 2014. Role of  
683 disease-associated tolerance in infectious superspreaders. *Proc. Natl.*  
684 *Acad. Sci.* 111, 15780–15785. doi:10.1073/pnas.1409968111
- 685 Gottschalk, P.G., Dunn, J.R., 2005. Measuring parallelism, linearity, and relative  
686 potency in bioassay and immunoassay data. *J. Biopharm. Stat.* 15, 437–  
687 463. doi:10.1081/BIP-200056532
- 688 Gozzelino, R., Andrade, B.B., Larsen, R., Luz, N.F., Vanoaica, L., Seixas, E., Coutinho,  
689 A., Cardoso, S., Rebelo, S., Poli, M., Barral-Netto, M., Darshan, D., Kühn, L.C.,  
690 Soares, M.P., 2012. Metabolic Adaptation to Tissue Iron Overload Confers  
691 Tolerance to Malaria. *Cell Host Microbe* 12, 693–704.  
692 doi:10.1016/j.chom.2012.10.011
- 693 Ha, E.-M., Oh, C.-T., Bae, Y.S., Lee, W.-J., 2005. A Direct Role for Dual Oxidase in  
694 *Drosophila* Gut Immunity. *Science* 310, 847–850.  
695 doi:10.1126/science.1117311
- 696 Hamilton, P.T., Perlman, S.J., 2013. Host Defense via Symbiosis in *Drosophila*.  
697 *PLoS Pathog* 9, e1003808. doi:10.1371/journal.ppat.1003808
- 698 Hedges, L.M., Brownlie, J.C., O'Neill, S.L., Johnson, K.N., 2008. *Wolbachia* and Virus  
699 Protection in Insects. *Science* 322, 702. doi:10.1126/science.1162418
- 700 Hedges, L.M., Johnson, K.N., 2008. Induction of Host Defence Responses by  
701 *Drosophila* C Virus. *J. Gen. Virol.* 89, 1497–1501. doi:10.1099/vir.0.83684-  
702 0
- 703 He, J., Baldini, R.L., Déziel, E., Saucier, M., Zhang, Q., Liberati, N.T., Lee, D., Urbach,  
704 J., Goodman, H.M., Rahme, L.G., 2004. The broad host range pathogen  
705 *Pseudomonas aeruginosa* strain PA14 carries two pathogenicity islands

- 706 harboring plant and animal virulence genes. *Proc. Natl. Acad. Sci. U. S. A.*  
707 101, 2530–2535.
- 708 Howick, V.M., Lazzaro, B.P., 2014. Genotype and diet shape resistance and  
709 tolerance across distinct phases of bacterial infection. *BMC Evol. Biol.* 14,  
710 56. doi:10.1186/1471-2148-14-56
- 711 Jamieson, A.M., Pasman, L., Yu, S., Gamradt, P., Homer, R.J., Decker, T., Medzhitov,  
712 R., 2013. Role of Tissue Protection in Lethal Respiratory Viral-Bacterial  
713 Coinfection. *Science* 340, 1230–1234. doi:10.1126/science.1233632
- 714 Johnson, K.N., 2015. Bacteria and antiviral immunity in insects. *Curr. Opin. Insect*  
715 *Sci.* 8, 97–103.
- 716 Johnson, K.N., 2015. Bacteria and antiviral immunity in insects. *Curr. Opin. Insect*  
717 *Sci.* doi:10.1016/j.cois.2015.01.008
- 718 Kambris, Z., Blagborough, A.M., Pinto, S.B., Blagrove, M.S.C., Godfray, H.C.J.,  
719 Sinden, R.E., Sinkins, S.P., 2010. Wolbachia Stimulates Immune Gene  
720 Expression and Inhibits Plasmodium Development in *Anopheles gambiae*.  
721 *PLoS Pathog* 6, e1001143. doi:10.1371/journal.ppat.1001143
- 722 Kemp, C., Imler, J.-L., 2009. Antiviral immunity in drosophila. *Curr. Opin.*  
723 *Immunol.* 21, 3–9. doi:10.1016/j.coi.2009.01.007
- 724 Kuraishi, T., Binggeli, O., Opota, O., Buchon, N., Lemaitre, B., 2011. Genetic  
725 evidence for a protective role of the peritrophic matrix against intestinal  
726 bacterial infection in *Drosophila melanogaster*. *Proc. Natl. Acad. Sci.* 108,  
727 15966–15971. doi:10.1073/pnas.1105994108
- 728 Lass, S., Hudson, P.J., Thakar, J., Saric, J., Harvill, E., Albert, R., Perkins, S.E., 2013.  
729 Generating super-shedders: co-infection increases bacterial load and egg  
730 production of a gastrointestinal helminth. *J. R. Soc. Interface* 10,  
731 20120588. doi:10.1098/rsif.2012.0588
- 732 Lee, K.-A., Kim, S.-H., Kim, E.-K., Ha, E.-M., You, H., Kim, B., Kim, M.-J., Kwon, Y.,  
733 Ryu, J.-H., Lee, W.-J., 2013. Bacterial-Derived Uracil as a Modulator of  
734 Mucosal Immunity and Gut-Microbe Homeostasis in *Drosophila*. *Cell* 153,  
735 797–811. doi:10.1016/j.cell.2013.04.009
- 736 Lefèvre, T., Williams, A.J., de Roode, J.C., 2011. Genetic variation in resistance, but  
737 not tolerance, to a protozoan parasite in the monarch butterfly. *Proc. Biol.*  
738 *Sci.* 278, 751–759. doi:10.1098/rspb.2010.1479
- 739 Lehane, M.J., 1997. Peritrophic Matrix Structure and Function. *Annu. Rev.*  
740 *Entomol.* 42, 525–550. doi:10.1146/annurev.ento.42.1.525
- 741 Lemaitre, B., Miguel-Aliaga, I., 2013. The digestive tract of *Drosophila*  
742 *melanogaster*. *Annu. Rev. Genet.* 47, 377–404. doi:10.1146/annurev-  
743 *genet*-111212-133343
- 744 Lewis, Z., Lizé, A., 2015. Insect behaviour and the microbiome. *Curr. Opin. Insect*  
745 *Sci.*
- 746 Liehl, P., Blight, M., Vodovar, N., Boccard, F., Lemaitre, B., 2006. Prevalence of  
747 Local Immune Response against Oral Infection in a  
748 *Drosophila/Pseudomonas* Infection Model. *PLoS Pathog* 2, e56.  
749 doi:10.1371/journal.ppat.0020056
- 750 Livak, K.J., Schmittgen, T.D., 2001. Analysis of relative gene expression data using  
751 real-time quantitative PCR and the 2<sup>-</sup>(-Delta Delta C(T)) Method. *Methods*  
752 *San Diego Calif* 25, 402–408. doi:10.1006/meth.2001.1262
- 753 Lough, G., Kyriazakis, I., Bergmann, S., Lengeling, A., Doeschl-Wilson, A.B., 2015.  
754 Health trajectories reveal the dynamic contributions of host genetic

- 755 resistance and tolerance to infection outcome. *Proc R Soc B* 282,  
756 20152151. doi:10.1098/rspb.2015.2151
- 757 Marriott, I., Huet-Hudson, Y.M., 2006. Sexual dimorphism in innate immune  
758 responses to infectious organisms. *Immunol. Res.* 34, 177–192.  
759 doi:10.1385/IR:34:3:177
- 760 Martinez, J., Longdon, B., Bauer, S., Chan, Y.-S., Miller, W.J., Bourtzis, K., Teixeira,  
761 L., Jiggins, F.M., 2014. Symbionts Commonly Provide Broad Spectrum  
762 Resistance to Viruses in Insects: A Comparative Analysis of Wolbachia  
763 Strains. *PLoS Pathog* 10, e1004369. doi:10.1371/journal.ppat.1004369
- 764 Martins, N.E., Faria, V.G., Teixeira, L., Magalhães, S., Sucena, É., 2013. Host  
765 Adaptation Is Contingent upon the Infection Route Taken by Pathogens.  
766 *PLoS Pathog.* 9. doi:10.1371/journal.ppat.1003601
- 767 Mateos, M., Castrezana, S.J., Nankivell, B.J., Estes, A.M., Markow, T.A., Moran, N.A.,  
768 2006. Heritable Endosymbionts of *Drosophila*. *Genetics* 174, 363–376.  
769 doi:10.1534/genetics.106.058818
- 770 Medzhitov, R., Schneider, D.S., Soares, M.P., 2012. Disease Tolerance as a Defense  
771 Strategy. *Science* 335, 936–941. doi:10.1126/science.1214935
- 772 Merklung, S.H., Bronkhorst, A.W., Kramer, J.M., Overheul, G.J., Schenck, A., Van Rij,  
773 R.P., 2015. The Epigenetic Regulator G9a Mediates Tolerance to RNA  
774 Virus Infection in *Drosophila*. *PLoS Pathog* 11, e1004692.  
775 doi:10.1371/journal.ppat.1004692
- 776 Mikkelsen, H., McMullan, R., Filloux, A., 2011. The *Pseudomonas aeruginosa*  
777 Reference Strain PA14 Displays Increased Virulence Due to a Mutation in  
778 *ladS*. *PLoS ONE* 6. doi:10.1371/journal.pone.0029113
- 779 Moreira, L.A., Iturbe-Ormaetxe, I., Jeffery, J.A., Lu, G., Pyke, A.T., Hedges, L.M.,  
780 Rocha, B.C., Hall-Mendelin, S., Day, A., Riegler, M., Hugo, L.E., Johnson, K.N.,  
781 Kay, B.H., McGraw, E.A., van den Hurk, A.F., Ryan, P.A., O'Neill, S.L., 2009. A  
782 *Wolbachia* Symbiont in *Aedes aegypti* Limits Infection with Dengue,  
783 Chikungunya, and Plasmodium. *Cell* 139, 1268–1278.  
784 doi:10.1016/j.cell.2009.11.042
- 785 Mulcahy, H., Sibley, C.D., Surette, M.G., Lewenza, S., 2011. *Drosophila*  
786 *melanogaster* as an Animal Model for the Study of *Pseudomonas*  
787 *aeruginosa* Biofilm Infections In Vivo. *PLoS Pathog* 7, e1002299.  
788 doi:10.1371/journal.ppat.1002299
- 789 Neyen, C., Bretscher, A.J., Binggeli, O., Lemaitre, B., 2014. Methods to study  
790 *Drosophila* immunity. *Methods San Diego Calif* 68, 116–128.  
791 doi:10.1016/j.ymeth.2014.02.023
- 792 Nunn, C.L., Lindenfors, P., Pursall, E.R., Rolff, J., 2009. On sexual dimorphism in  
793 immune function. *Philos. Trans. R. Soc. Lond. B Biol. Sci.* 364, 61–69.  
794 doi:10.1098/rstb.2008.0148
- 795 Obbard, D.J., Gordon, K.H.J., Buck, A.H., Jiggins, F.M., 2009. The evolution of RNAi  
796 as a defence against viruses and transposable elements. *Philos. Trans. R.*  
797 *Soc. B Biol. Sci.* 364, 99–115. doi:10.1098/rstb.2008.0168
- 798 Pamplona, A., Ferreira, A., Balla, J., Jeney, V., Balla, G., Epiphanyo, S., Chora, Â.,  
799 Rodrigues, C.D., Gregoire, I.P., Cunha-Rodrigues, M., Portugal, S., Soares,  
800 M.P., Mota, M.M., 2007. Heme oxygenase-1 and carbon monoxide suppress  
801 the pathogenesis of experimental cerebral malaria. *Nat. Med.* 13, 703–  
802 710. doi:10.1038/nm1586

- 803 Pan, X., Zhou, G., Wu, J., Bian, G., Lu, P., Raikhel, A.S., Xi, Z., 2012. Wolbachia  
804 induces reactive oxygen species (ROS)-dependent activation of the Toll  
805 pathway to control dengue virus in the mosquito *Aedes aegypti*. Proc.  
806 Natl. Acad. Sci. 109, E23–E31. doi:10.1073/pnas.1116932108
- 807 Råberg, L., Graham, A.L., Read, A.F., 2009. Decomposing health: tolerance and  
808 resistance to parasites in animals. Philos. Trans. R. Soc. Lond. B. Biol. Sci.  
809 364, 37–49. doi:10.1098/rstb.2008.0184
- 810 Råberg, L., Sim, D., Read, A.F., 2007. Disentangling genetic variation for resistance  
811 and tolerance to infectious diseases in animals. Science 318, 812–814.  
812 doi:10.1126/science.1148526
- 813 Rancès, E., Ye, Y.H., Woolfit, M., McGraw, E.A., O’Neill, S.L., 2012. The Relative  
814 Importance of Innate Immune Priming in Wolbachia-Mediated Dengue  
815 Interference. PLoS Pathog 8, e1002548.  
816 doi:10.1371/journal.ppat.1002548
- 817 Rottschaefer, S.M., Lazzaro, B.P., 2012. No Effect of Wolbachia on Resistance to  
818 Intracellular Infection by Pathogenic Bacteria in *Drosophila melanogaster*.  
819 PLoS ONE 7, e40500. doi:10.1371/journal.pone.0040500
- 820 Schneider, D.S., 2011. Tracing Personalized Health Curves during Infections.  
821 PLoS Biol. 9, e1001158.
- 822 Schneider, D.S., Ayres, J.S., Brandt, S.M., Costa, A., Dionne, M.S., Gordon, M.D.,  
823 Mabery, E.M., Moule, M.G., Pham, L.N., Shirasu-Hiza, M.M., 2007.  
824 *Drosophila eiger* Mutants Are Sensitive to Extracellular Pathogens. PLoS  
825 Pathog 3, e41. doi:10.1371/journal.ppat.0030041
- 826 Sears, B.F., Rohr, J.R., Allen, J.E., Martin, L.B., 2011. The economy of inflammation:  
827 when is less more? Trends Parasitol. 27, 382–387.  
828 doi:10.1016/j.pt.2011.05.004
- 829 Sibley, C.D., Duan, K., Fischer, C., Parkins, M.D., Storey, D.G., Rabin, H.R., Surette,  
830 M.G., 2008. Discerning the Complexity of Community Interactions Using a  
831 *Drosophila* Model of Polymicrobial Infections. PLoS Pathog 4, e1000184.  
832 doi:10.1371/journal.ppat.1000184
- 833 Simms, E., 2000. Defining tolerance as a norm of reaction. Evol. Ecol. 14, 563–  
834 570.
- 835 Soares, M.P., Gozzelino, R., Weis, S., 2014. Tissue damage control in disease  
836 tolerance. Trends Immunol. 35, 483–494. doi:10.1016/j.it.2014.08.001
- 837 Sternberg, E.D., Lefèvre, T., Li, J., de Castillejo, C.L.F., Li, H., Hunter, M.D., de Roode,  
838 J.C., 2012. Food plant derived disease tolerance and resistance in a natural  
839 butterfly-plant-parasite interactions. Evol. Int. J. Org. Evol. 66, 3367–3376.  
840 doi:10.1111/j.1558-5646.2012.01693.x
- 841 Stevanovic, A., Johnson, K.N., 2015. Infectivity of *Drosophila* C virus following  
842 oral delivery in *Drosophila* larvae. J. Gen. Virol. doi:10.1099/vir.0.000068
- 843 Stramer, B., Winfield, M., Shaw, T., Millard, T.H., Woolner, S., Martin, P., 2008.  
844 Gene induction following wounding of wild-type versus macrophage-  
845 deficient *Drosophila* embryos. EMBO Rep. 9, 465–471.  
846 doi:10.1038/embor.2008.34
- 847 Susi, H., Barrès, B., Vale, P.F., Laine, A.-L., 2015. Co-infection alters population  
848 dynamics of infectious disease. Nat. Commun. 6.  
849 doi:10.1038/ncomms6975

- 850 Takekawa, M., Saito, H., 1998. A family of stress-inducible GADD45-like proteins  
851 mediate activation of the stress-responsive MTK1/MEKK4 MAPKKK. *Cell*  
852 95, 521–530.
- 853 Teixeira, L., 2012. Whole-genome expression profile analysis of *Drosophila*  
854 *melanogaster* immune responses. *Brief. Funct. Genomics* 11, 375–386.  
855 doi:10.1093/bfgp/els043
- 856 Teixeira, L., Ferreira, Á., Ashburner, M., 2008. The Bacterial Symbiont *Wolbachia*  
857 Induces Resistance to RNA Viral Infections in *Drosophila melanogaster*.  
858 *PLoS Biol* 6, e1000002. doi:10.1371/journal.pbio.1000002
- 859 Vale, P.F., Choisy, M., Little, T.J., 2013. Host nutrition alters the variance in  
860 parasite transmission potential. *Biol. Lett.* 9, 20121145.  
861 doi:10.1098/rsbl.2012.1145
- 862 Vale, P.F., Fenton, A., Brown, S.P., 2014. Limiting Damage during Infection:  
863 Lessons from Infection Tolerance for Novel Therapeutics. *PLoS Biol* 12,  
864 e1001769. doi:10.1371/journal.pbio.1001769
- 865 Vale, P.F., Little, T.J., 2012. Fecundity compensation and tolerance to a sterilizing  
866 pathogen in *Daphnia*. *J. Evol. Biol.* 25, 1888–1896. doi:10.1111/j.1420-  
867 9101.2012.02579.x
- 868 Vale, P.F., McNally, L., Doeschl-Wilson, A.B., King, K.C., Domingo-Sananes, M.R.,  
869 Popat, R., Allen, J.E., Soares, M.P., Kummerli, R., 2016. Beyond killing: can  
870 we find new ways to manage infection? *Evol. Med. Public Health* in press.
- 871 Vale, P.F., Wilson, A.J., Best, A., Boots, M., Little, T.J., 2011. Epidemiological,  
872 Evolutionary, and Coevolutionary Implications of Context-Dependent  
873 Parasitism. *Am. Nat.* 177, 510–521.
- 874 Vincent, C.M., Sharp, N.P., 2014. Sexual antagonism for resistance and tolerance  
875 to infection in *Drosophila melanogaster*. *Proc. Biol. Sci.* 281, 20140987.  
876 doi:10.1098/rspb.2014.0987
- 877 Weinert, L.A., Araujo-Jnr, E.V., Ahmed, M.Z., Welch, J.J., 2015. The incidence of  
878 bacterial endosymbionts in terrestrial arthropods. *Proc. R. Soc. Lond. B*  
879 *Biol. Sci.* 282, 20150249. doi:10.1098/rspb.2015.0249
- 880 Werren, J.H., Baldo, L., Clark, M.E., 2008. *Wolbachia*: master manipulators of  
881 invertebrate biology. *Nat. Rev. Microbiol.* 6, 741–751.  
882 doi:10.1038/nrmicro1969
- 883 Wong, Z.S., Brownlie, J.C., Johnson, K.N., 2015. Oxidative Stress Correlates with  
884 *Wolbachia*-Mediated Antiviral Protection in *Wolbachia*-*Drosophila*  
885 Associations. *Appl. Environ. Microbiol.* 81, 3001–3005.  
886 doi:10.1128/AEM.03847-14
- 887 Wong, Z.S., Hedges, L.M., Brownlie, J.C., Johnson, K.N., 2011. *Wolbachia*-Mediated  
888 Antibacterial Protection and Immune Gene Regulation in *Drosophila*.  
889 *PLoS ONE* 6, e25430. doi:10.1371/journal.pone.0025430
- 890 Xi, Z., Gavotte, L., Xie, Y., Dobson, S.L., 2008. Genome-wide analysis of the  
891 interaction between the endosymbiotic bacterium *Wolbachia* and its  
892 *Drosophila* host. *BMC Genomics* 9, 1. doi:10.1186/1471-2164-9-1
- 893 Ye, Y.H., Woolfit, M., Rancès, E., O'Neill, S.L., McGraw, E.A., 2013. *Wolbachia*-  
894 Associated Bacterial Protection in the Mosquito *Aedes aegypti*. *PLoS Negl*  
895 *Trop Dis* 7, e2362. doi:10.1371/journal.pntd.0002362
- 896 Yilmaz, B., Portugal, S., Tran, T.M., Gozzelino, R., Ramos, S., Gomes, J., Regalado, A.,  
897 Cowan, P.J., d'Apice, A.J.F., Chong, A.S., Doumbo, O.K., Traore, B., Crompton,  
898 P.D., Silveira, H., Soares, M.P., 2014. Gut Microbiota Elicits a Protective

- 899 Immune Response against Malaria Transmission. *Cell* 159, 1277–1289.  
900 doi:10.1016/j.cell.2014.10.053
- 901 Zambon, R.A., Vakharia, V.N., Wu, L.P., 2006. RNAi is an antiviral immune  
902 response against a dsRNA virus in *Drosophila melanogaster*. *Cell*.  
903 *Microbiol.* 8, 880–889. doi:10.1111/j.1462-5822.2006.00688.x
- 904 Zhang, G., Hussain, M., O'Neill, S.L., Asgari, S., 2013. Wolbachia uses a host  
905 microRNA to regulate transcripts of a methyltransferase, contributing to  
906 dengue virus inhibition in *Aedes aegypti*. *Proc. Natl. Acad. Sci.* 110,  
907 10276–10281. doi:10.1073/pnas.1303603110
- 908 Zug, R., Hammerstein, P., 2015. Wolbachia and the insect immune system: what  
909 reactive oxygen species can tell us about the mechanisms of Wolbachia–  
910 host interactions. *Evol. Genomic Microbiol.* 1201.  
911 doi:10.3389/fmicb.2015.01201
- 912 Zuk, M., McKean, K.A., 1996. Sex differences in parasite infections: Patterns and  
913 processes. *Int. J. Parasitol.* 26, 1009–1024. doi:10.1016/S0020-  
914 7519(96)80001-4

915

916

## 917 Figure Legends

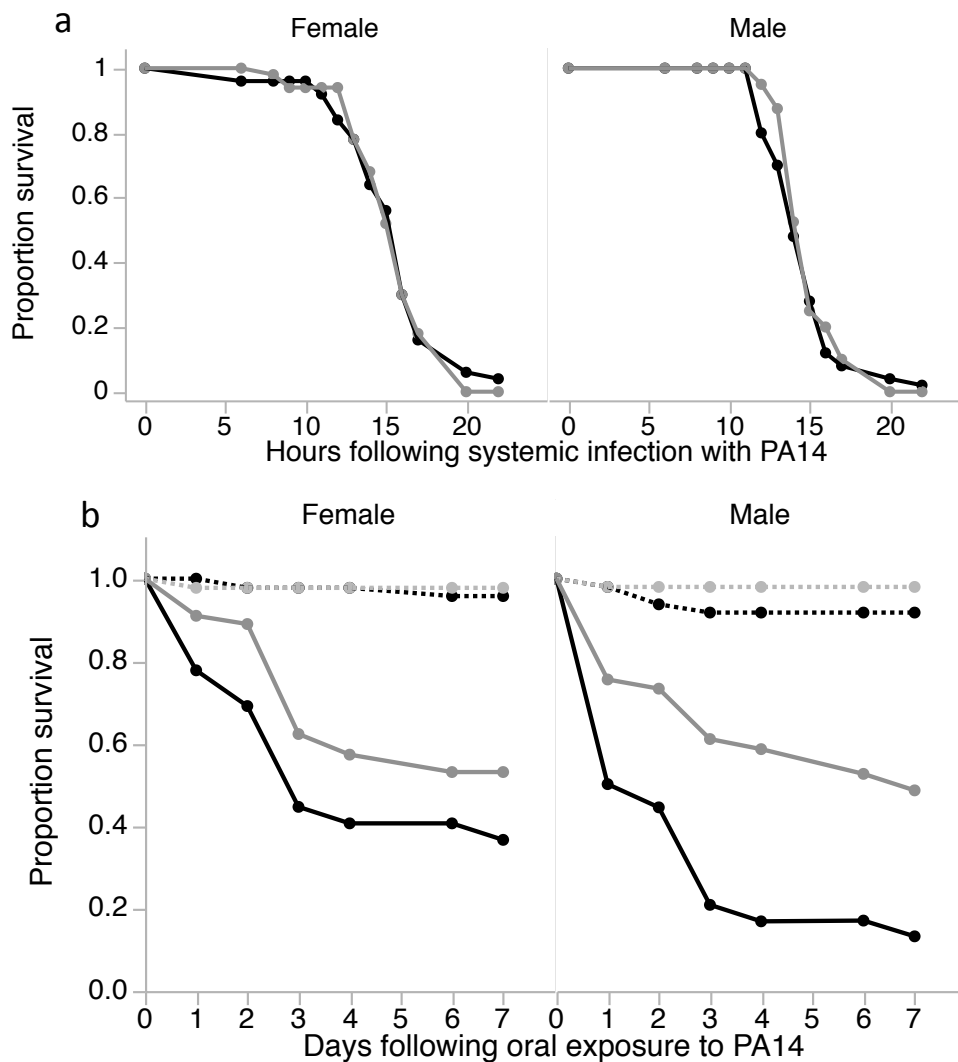

918

919 **Figure 1. Fly survival after systemic (Fig. 1a) oral infection (Fig. 1b) with *P.***

920 ***aeruginosa* PA14. *OreR<sup>Wol-</sup>* (black line), *OreR<sup>Wol+</sup>* (grey line) were either pricked with a**

921 **needle dipped in PA14 culture (OD=1) , or left to feed on a PA14 culture (OD=23) or on a**

922 **control solution of 5% sugar for 12 hours. Survival was monitored for 24h (systemic**

923 **infection) or daily (oral infection). Data were analysed using a Cox Proportional Hazard**

924 **model.**

925

926



927

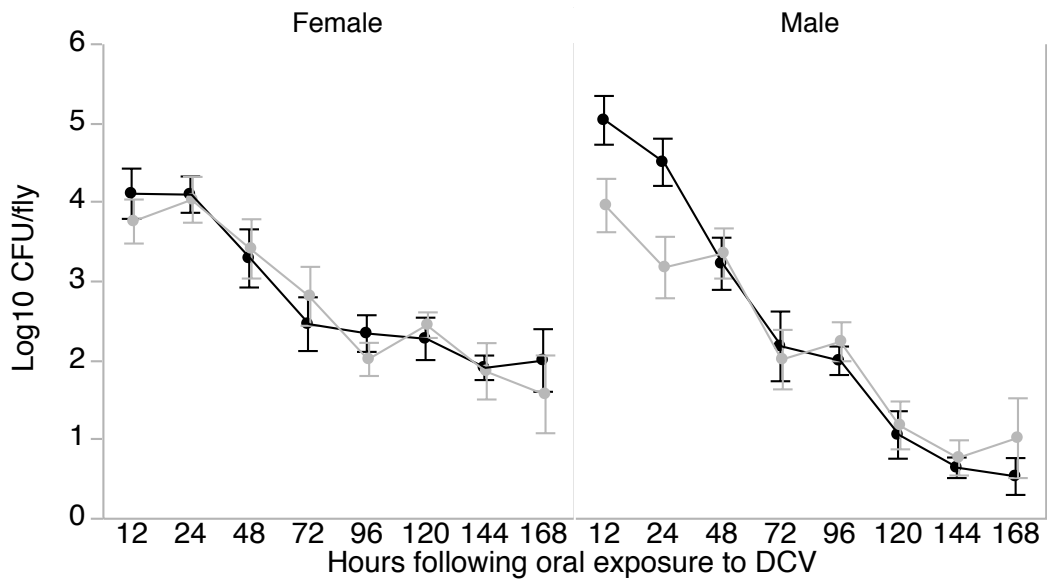

928

929

930

931 **Figure 2. Within-host microbe loads.** The number of viable within-host CFUs was  
932 quantified in 5-7 individual live flies following 12 hours of oral exposure, and then every  
933 24 hours for a week. Males and females are plotted separately for *OreR<sup>Wol-</sup>* (black  
934 triangles) and *OreR<sup>Wol+</sup>* (grey circles) flies. Data shown are means  $\pm$  SEM.

935

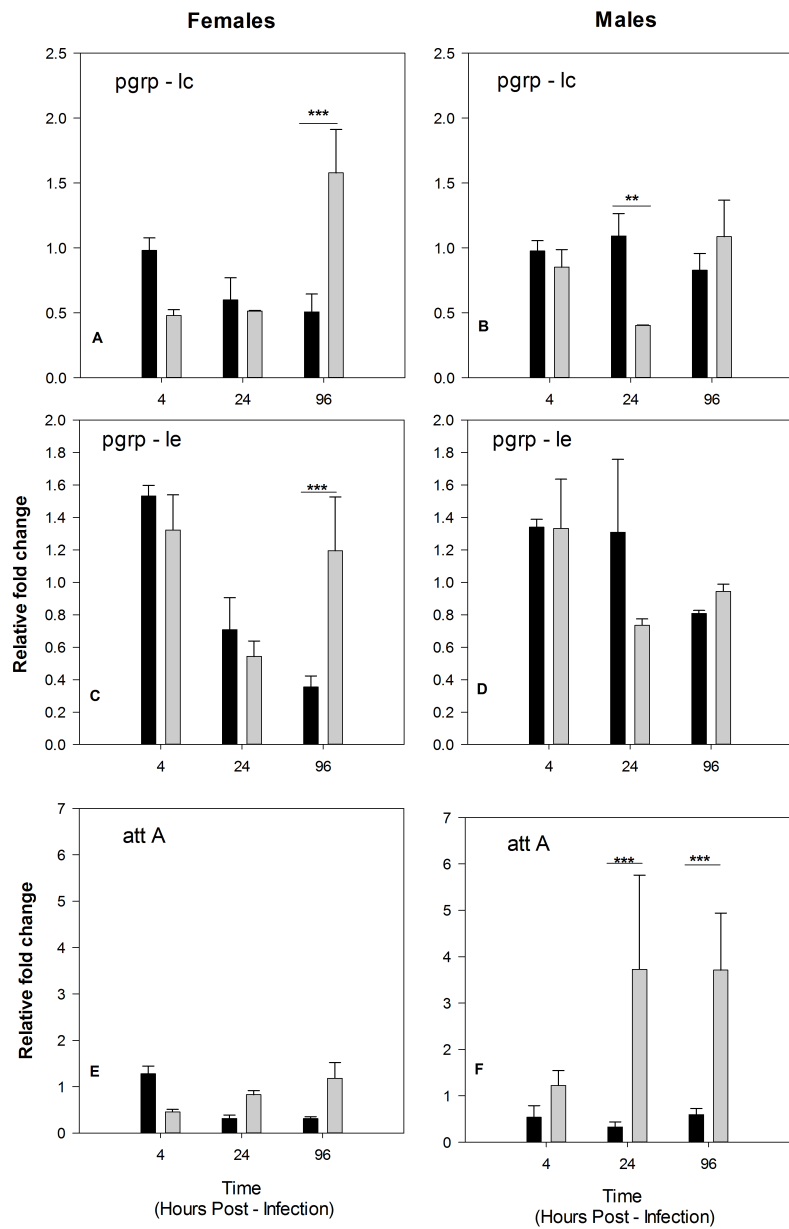

936

937 **Figure 3. Gene expression of IMD pathway genes.** Figures show gene expression

938 relative to *rp49* control gene in infected flies relative to uninfected flies. Mean of 3

939 biological replicates  $\pm$  SE.

940

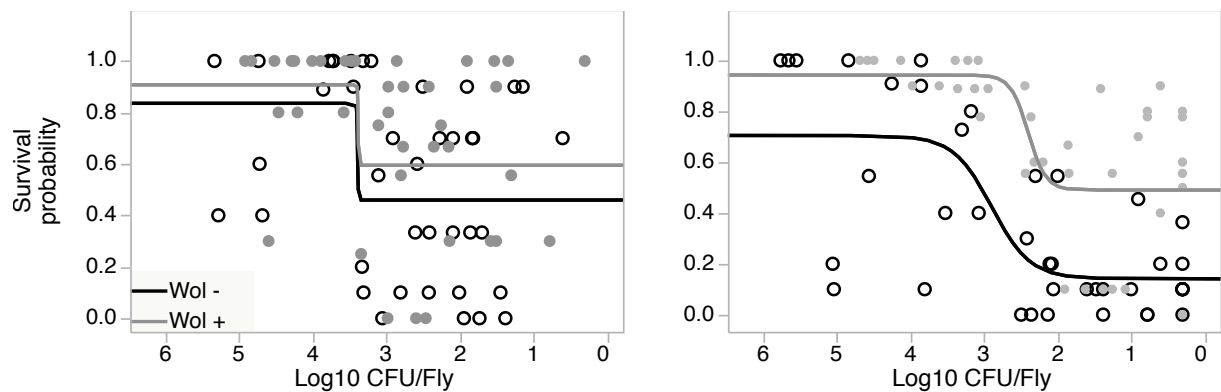

941

942 **Figure 4. Disease tolerance.** To measure tolerance we analysed the relationship  
943 between host health and microbe loads. For each time point, we plot the survival  
944 probability (as a measure of health) against the microbe load (number of CFU per fly)  
945 for 5 biological replicates per sex and *Wolbachia* combination. Here we show the fit of a  
946 4-parameter Logistic model to the data (see Table S1 for model fits). The X axis is  
947 reversed to read from beginning to the end of the infection (only clearance occurred.)

948

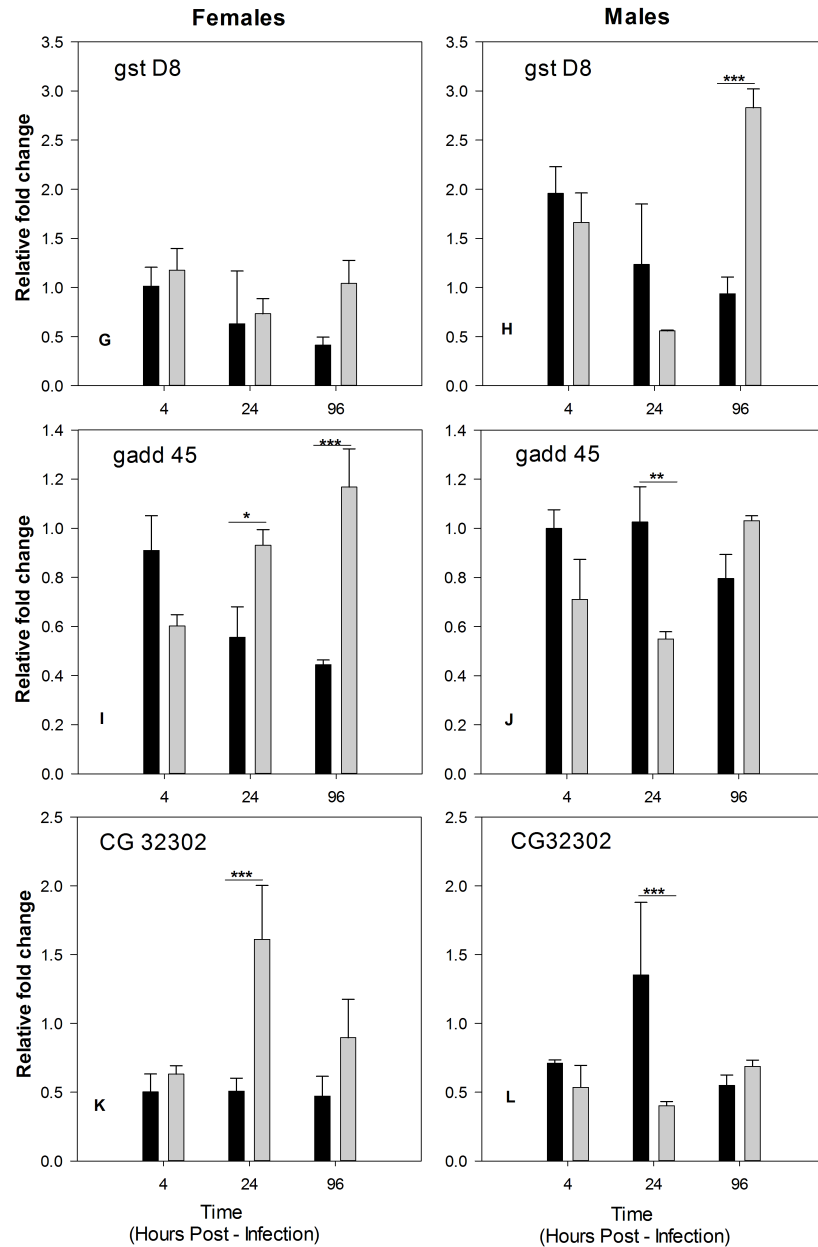

949

950 **Figure 5. Gene expression of IMD pathway genes.** Figures show gene expression  
951 relative to *rp49* control gene in infected flies relative to uninfected flies. Mean of 3  
952 biological replicates  $\pm$  SE.

953

954 **Supporting Information**

955

956

957 **Fig S1. Quantification of food intake.** To quantify feeding, individual flies were fed on  
958 blue-dyed medium for 24 hours, homogenised and suspended in buffer. The absorbance  
959 of this suspension, which is proportional to the amount of food intake (Bashir-Tanoli  
960 and Tinsley, 2014), was measured at 520 nm. Data shown are means  $\pm$  SEM.

961

962 **Fig S2. Inhibition of PA14 growth in liquid culture.** Single sex groups of *Wolbachia*  
963 positive or *Wolbachia* negative flies were homogenised, centrifuged and the supernatant  
964 was inoculated into PA14 cultures growing in 96-well plates. Absorbance was measured  
965 every 30 minutes.

966

967 **Fig S3. Inhibition zone assay.** Single sex groups of *Wolbachia* positive or *Wolbachia*  
968 negative flies were homogenised, centrifuged and the supernatant was spotted on a  
969 lawn of PA14 overnight. The figure shows the size of the zone where PA14 growth was  
970 inhibited. Data shown are means  $\pm$  SEM.

971

972 **S1 file.** Materials and methods for feeding assay and PA14 growth inhibition assays.

973

974

## Supplementary information

975

***Wolbachia* confers sex-specific resistance and tolerance to enteric but not**

976

**systemic bacterial infection in *Drosophila***

977

Radhakrishnan B. Vasanthakrishnan <sup>1,3§</sup>, Gupta Vanika <sup>1§</sup>, Jonathon Siva-Jothy, Katy M.

978

Monteith<sup>1</sup>, Sam P. Brown<sup>4</sup>, Pedro F. Vale<sup>1,2\*</sup>,

979

980

981 **Table S1: Primer list**

982

| Primer name                            | Gene function                                 | Sequence (5'->3')                                 |
|----------------------------------------|-----------------------------------------------|---------------------------------------------------|
| PGRP-LC Forward<br>PGRP-LC Reverse     | IMD immune pathway-<br>Extracellular receptor | TTGAACCAAAGTAAGATCAGAGAT<br>GTCCAGATATATTGTTGAATT |
| PGRP - LE Forward<br>PGRP - LE Reverse | IMD immune pathway-<br>Intracellular receptor | GATGCCGACCAAATACCAG<br>GTCTTCGAAATGTGTCCGAG       |
| Attacin A Forward<br>Attacin A Reverse | IMD immune pathway-<br>Antimicrobial peptide  | GGCCCATGCCAATTTATTCA<br>CATTGCGCTGGAACCTCGAA      |
| Gst D8 Forward<br>Gst D8 Reverse       | Stress response                               | GGAATCCCGTGCCATTTTGA<br>CCCATGTCTGAAGTAGAGCCT     |
| CG32302 Forward<br>CG32302 Reverse     | Peritrophic matrix                            | CGATGGAGAACTGGAGGTGA<br>TATCAGTCACGCAGGTCAGG      |
| Gadd45 Forward<br>Gadd45 Reverse       | Wounding stress                               | ACTGGACCTGGAGCTAGAGA<br>CTTGGAGAGCACGTTGATGG      |

983

984

985

986

987

988 **Feeding assay**

989 All flies used were 0-72 hour old adult Oregon R flies, and Wol- and wol+ individuals  
990 were raised separately in 6oz bottles on lewis medium at a constant temperature of  
991 25°C on a 12:12 light:dark cycle. Subjects were starved for 2 hours by placing them in  
992 empty vial before CO<sub>2</sub> anaesthesia was used to separate sexes. While still anaesthetised  
993 each fly was placed into an individual 23ml vial containing Blue-dyed Lewis medium  
994 (Blue Dye number 1, 0.5g/litre). Between 22-24 individual flies per Sex/Wolbachia  
995 combination were set up. All flies were left to feed on the blue dyed medium for 24hours  
996 at 25 degrees under 12:12 light:dark cycle. After 24 hours flies were immediately frozen  
997 to kill and then decapitated using a scalpel. Decapitation avoids inaccurate absorbance  
998 readings due to eye pigments. Each individual fly was then placed in an Eppendorf tube  
999 containing 100ul of ice-cold Ringer's solution, homogenised using a motorised pestle  
1000 and then centrifuged for 10mins at ~13300g at 20°C. 80 µl of this supernatant were  
1001 loaded into a 96-well plate and the blue pigment was measured using a VersaMax  
1002 microplate reader, recording absorbance at 520nm.

1003

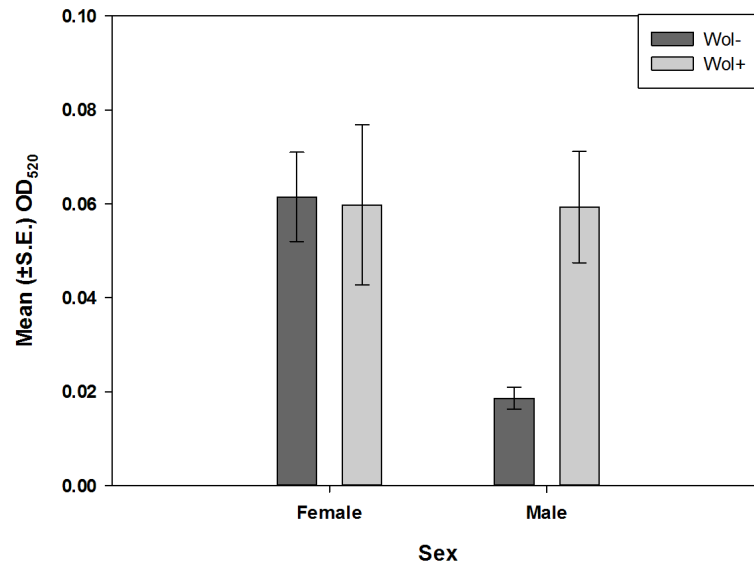

1004

1005

1006 **Fig S1. Quantification of food intake.** To quantify feeding, individual flies were fed on  
1007 blue-dyed medium for 24 hours, homogenised and suspended in buffer. The absorbance  
1008 of this suspension, which is proportional to the amount of food intake (Bashir-Tanoli  
1009 and Tinsley, 2014), was measured at 520 nm. Data shown are means  $\pm$  SEM

1010



1011 ***Pseudomonas aeruginosa* PA14 inhibition assay**

1012 Wol+ and Wol- flies were grown in 6 oz plastic bottles on standard Lewis medium under  
1013 standard laboratory conditions at 25°C , 12:12 Light:Dark cycle. Six days post eclosion,  
1014 flies were sex separated and divided into cohorts of 10 flies each (n = 10 per sex per  
1015 line). Flies were anaesthetized using cold anaesthesia. To each sample, 250 µl of LB was  
1016 added and samples were crushed using an automated pestle and centrifuged at 11,000g  
1017 for 5 minutes. Supernatant from these samples was used to assay antibacterial response.  
1018 100 µl from supernatant was transferred to a well in 96-well plate. PA14 cultures were  
1019 grown as follows. A single colony was picked from the PA plate and 5 ml of LB medium  
1020 was inoculated. The culture was grown overnight at 37°C at 200 rpm. 100 µl of the  
1021 overnight culture was used to seed 5ml of LB. OD was monitored and culture was taken  
1022 out after it reached  $OD_{600} = 1$ . The OD of the culture was adjusted to 0.02. Each well was  
1023 seeded with 100 µl of this culture and was mixed well with fly homogenate by pipetting.  
1024 For controls, LB without any bacteria was used. Bacterial growth in 96-well plate was  
1025 monitored overnight using Thermo Scientific Varioskan Flash. Plate was incubated at  
1026 37°C and readings were collected every half an hour intervals for 16 hours. Data  
1027 obtained was used to obtain lag phase time, growth rate and saturation time for each  
1028 well using Growth Curve Analysis Tool (GCAT). These data were analysed using ANOVA  
1029 with fly sex and Wolbachia status as factors.

1030

1031

1032

1033

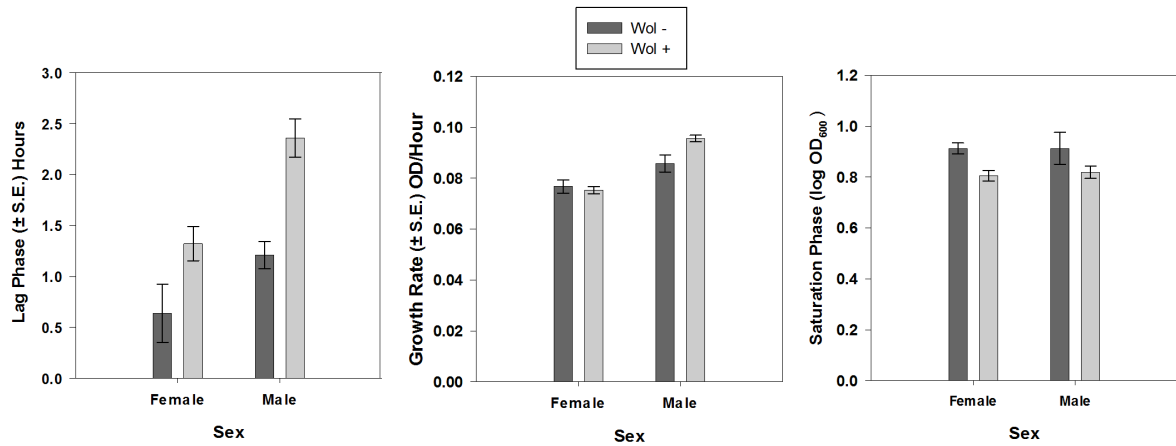

1034

1035 **Fig S2. Inhibition of PA14 growth in liquid culture.** Single sex groups of *Wolbachia*

1036 positive or *Wolbachia* negative flies were homogenised, centrifuged and the supernatant

1037 was inoculated into PA14 cultures growing in 96-well plates. Absorbance was measured

1038 every 30 minutes. This assay showed that PA14 cultures exhibited a significantly longer

1039 lag phase and lower total yield during saturation phase when exposed to homogenised

1040 *Wolbachia*-positive flies.

1041

1042

1043 We also carried out an inhibition zone assay on PA14 grown on a solid medium.  
1044 Bacterial cultures and fly homogenate were both prepared as described above. When  
1045 growing the PA14 culture, 100  $\mu$ l of a 500-fold dilution was used to plate on LB agar  
1046 plates to obtain a uniform PA14 lawn. After 30 minutes, 100  $\mu$ l of fly homogenate was  
1047 put on the plate. Plates were incubated at 37°C for overnight. Clearance zone formed by  
1048 fly homogenate was measured using Image J and area values were analysed using  
1049 ANOVA with fly sex and Wolbachia status as factors.

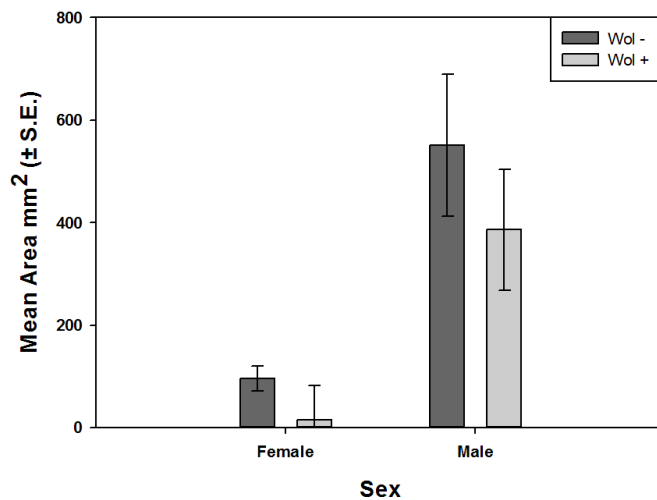

1050 **Fig S3. Inhibition zone assay.** Single sex groups of *Wolbachia* positive or *Wolbachia*  
1051 negative flies were homogenised, centrifuged and the supernatant was spotted on a  
1052 lawn of PA14 overnight. The figure shows the size of the zone where PA14 growth was  
1053 inhibited. Data shown are means  $\pm$  SEM.  
1054  
1055

1056

1057 **Table S1 Fits of non-linear tolerance curves**

| Sex    | Model       | AICc        | AICc Weight | R-Square    |
|--------|-------------|-------------|-------------|-------------|
| Female | Logistic 4P | 59.83289049 | 0.80614163  | 0.239893273 |
|        | Linear      | 62.68315369 | 0.193858371 | 0.110112664 |
| Male   | Logistic 4P | 18.97942649 | 0.511289458 | 0.572646097 |
|        | Linear      | 19.0697575  | 0.488710542 | 0.516645982 |

1058

1059 To assess the form of the health/microbe relationship, we fit linear and non-linear 4-  
1060 parameter logistic model separately to the time-matched survival/microbe load plots. In  
1061 all cases, the 4 parameter logistic model - which is commonly use to asses dose-  
1062 response curves - outperformed the linear fit.

1063
